# Supplementary material for: Efficacy and safety of sitagliptin in elderly patients with type 2 diabetes mellitus and comparison of hypoglycemic action of concomitant medications: a subanalysis of the JAMP study
Source: Springer Nature journal article supplement (doi:10.1007/s13340-017-0330-2), 2017-07-28
Supplement: MOESM1 [file 13336110]

Table S1. HbA1c variations in cases where the sitagliptin dose was increased up to 100 mg till 12M (Age: ≥ 65 years)

|  | 0M | 1M | 3M | 12M | ⊿1M | ⊿3M | ⊿12M |
| --- | --- | --- | --- | --- | --- | --- | --- |
| Ｎ | 31 | 31 | 30 | 28 | 31 | 30 | 28 |
| Mean | 8.34 | 7.83 | 7.58 | 7.94 | -0.50 | -0.80 | -0.43 |
| SD | 1.20 | 0.95 | 1.00 | 1.30 | 0.59 | 1.20 | 1.07 |
| P |  |  |  |  | 0.000 | 0.001 | 0.046 |
